# Supplementary material for: Intramolecular electron transfer of light harvesting perylene-pyrene supramolecular conjugate
Source: Royal Society of Chemistry journal article supplement (doi:10.1039/c8pp00134k), 2018-06-22
Supplement: c8pp00134k1.pdf [file c8pp00134k1.pdf]

## *Supporting Information`s*

### **Intramolecular electron transfer of the light harvesting perylene-pyrene supramolecular conjugate**

**Mohamed E. El-Khouly,<sup>\*a,b</sup> Ahmed El-Refaey,<sup>a</sup> Shaban Y. Shaban,<sup>a</sup> Morad El-Hendawy<sup>c</sup>**

<sup>a</sup> *Department of Chemistry, Faculty of Science, Kafrelsheikh University, Kaf El-Sheikh 33516, Egypt (E-mail address: mohamedelkhouly@yahoo.com)*

<sup>b</sup> *School of Basic and Applied Science, Egypt-Japan University of Science and Technology, Alexandria, Egypt*

<sup>c</sup> *Department of Chemistry, Faculty of Science, Assiut University, New Vally, Egypt*

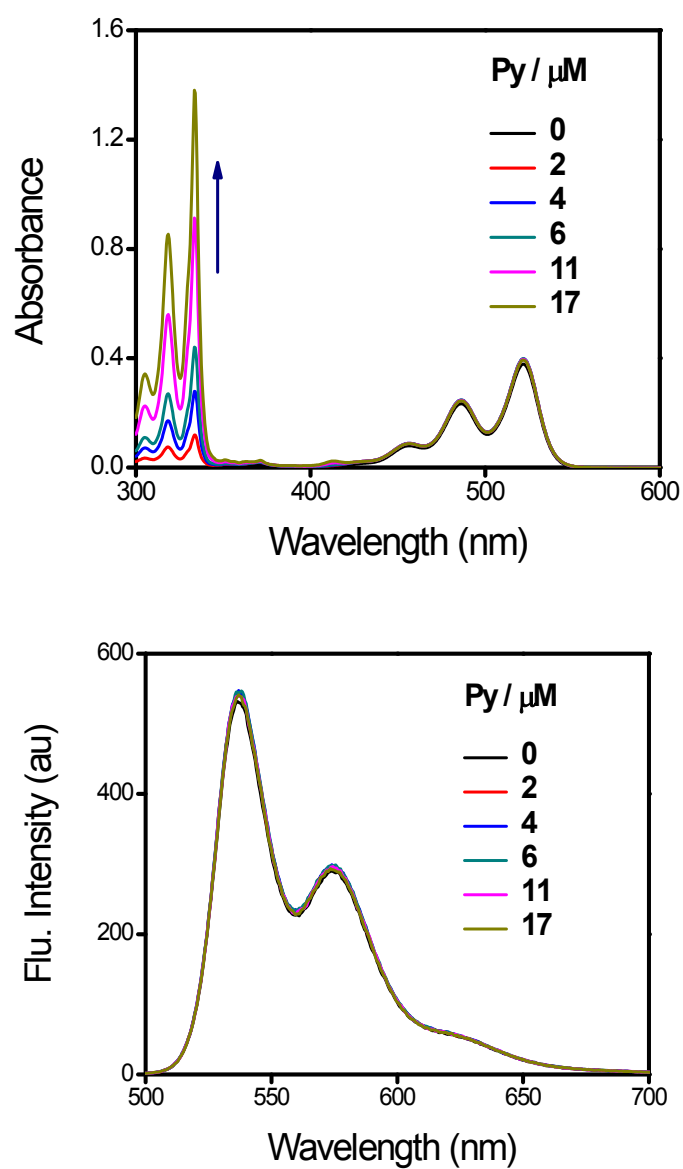

**Fig. S1** (Upper figure) Absorption spectral changes during the titration of TAIPDI ( $2 \times 10^{-5}$  M) with Py (0 - 17  $\mu$ M) in methanol. (Lower figure) Fluorescence spectra changes during the titration of TAIPDI ( $2 \times 10^{-5}$  M) with Py (0 - 17  $\mu$ M) in methanol at 298 K,  $\lambda_{\text{ex}} = 470$  nm.
